# Supplementary material for: Sensitive fluorescence assay of chloramphenicol coupled with two-level isothermal amplification using a self-powered catalyzed hairpin assembly and entropy-driven circuit
Source: Royal Society of Chemistry journal article supplement (doi:10.1039/d4ay00641k), 2024-01-01
Supplement: d4ay00641k1.pdf [file d4ay00641k1.pdf]

*Supporting information*

**Sensitive fluorescence assay of chloramphenicol coupled  
with two-level isothermal amplification using self-powered  
catalyzed hairpin assembly and entropy driven circuit**

**Zhengwei Xiong<sup>a, d</sup>, Cun Wang<sup>a</sup>, Cheng Liu<sup>a</sup>, Yue Jiang<sup>e</sup>, Yiping Li<sup>b, \*</sup>, Wen Yun<sup>c, \*</sup>**

<sup>a</sup> *Chongqing Research Station of Field Scientific Observation for Authentic Traditional Chinese Medicine in the Tree Gorges Reservoir Area, Chongqing University of Education, Chongqing 400067, China.*

<sup>b</sup> *The Third Hospital of Mianyang/Sichuan Mental Health Center, Mianyang, Sichuan, 621000, China.*

<sup>c</sup> *Chongqing Key Laboratory of Catalysis and New Environmental Materials, College of Environment and Resources, Chongqing Technology and Business University, Chongqing, 400067, China.*

<sup>d</sup> *Collaborative Innovation Center for Child Nutrition and Health Development, Chongqing University of Education, Chongqing 400067, China.*

<sup>e</sup> *Chongqing Nan'an District Ecological Environment Monitoring Station, Chongqing, 401336, China.*

*Supporting information*

**Table S1.** The sequences of used oligonucleotides in this work

| Note | Sequence (5' to 3')                                                                       |
|------|-------------------------------------------------------------------------------------------|
| H1   | GACCATGA-AAGT-GCTG-AACAGT-ACTT-GCTTAG-CAGC-<br>ACTTCAGTGAGTTGTCCCACGGTTCGGCGAGTCGGTGGTAGA |
| H2   | ACTT-GCTTAG-AGTCATGAAAAA-CTAAGC-AAGT-ACTGTT                                               |
| H3   | AGTCATGAAAAA-ACTT-GCTTAG-TTTTTCATGACT-<br>CTAAGC-TCATGGTC                                 |
| F    | CCTACGTCTCCAAG-CCCT-AGTCATGAAAAA                                                          |
| A    | FAM-CCTACGTCTCCAAG                                                                        |
| B    | CCCCCCCCCCC-CCCT-AGTCATGA                                                                 |
| C    | AACAGT-TTTTTCATGACT-AGGG-CTTGGAGACGTAGG-<br>Dabcyl                                        |

## *Supporting information*

**Table S2.** Comparisons with other aptamer based strategy for CAP detection

| Target     | Strategy                                                                                        | Linear range                                                            | LOD                                 | Ref                |
|------------|-------------------------------------------------------------------------------------------------|-------------------------------------------------------------------------|-------------------------------------|--------------------|
| CAP        | Colorimetry+aptamer (without amplification)                                                     | 1 – 120 nM                                                              | 0.451 nM                            | [1]                |
| CAP        | Electrochemistry+aptamer (without amplification)                                                | 1.76 – 127 nM                                                           | 1.76 nM                             | [2]                |
| CAP        | Fluorescence + aptamer (without amplification)                                                  | 0.1 – 10 nM                                                             | 98 pM                               | [3]                |
| CAP        | Entropy driven catalytic reaction + Dumbbell hairpin                                            | 20 – 4000 pM                                                            | 6 pM                                | [4]                |
| CAP        | Fluorescence + aptamer + hybridization chain reaction amplification                             | 15.47 pM - 4.641 nM (5 pg·mL <sup>-1</sup> to 1.5 ng·mL <sup>-1</sup> ) | 3.713 pM (1.2 pg·mL <sup>-1</sup> ) | [5]                |
| CAP        | Colorimetry + aptamer + polymeric HRP-antibody amplification                                    | 0.031 nM - 309.4 nM (0.01 - 100 ng mL <sup>-1</sup> )                   | 9.283 pM (3 pg ·mL <sup>-1</sup> )  | [6]                |
| CAP        | Colorimetry + aptamer + catalyzed hairpin assembly + hybridization chain reaction amplification | 0.1 fM - 0.01 nM                                                        | 11.6 aM                             | [7]                |
| <b>CAP</b> | <b>Fluorescence + aptamer + catalyzed hairpin assembly + Entropy driven catalytic reaction</b>  | <b>0.4 - 50 pM</b>                                                      | <b>0.1 pM</b>                       | <b>This method</b> |

### Reference:

- [1] K. Abnous, N.M. Danesh, M. Ramezani, A.S. Emrani, S.M.J.B. Taghdisi, *Bioelectronics*, A novel colorimetric sandwich aptasensor based on an indirect competitive enzyme-free method for ultrasensitive detection of chloramphenicol, 78 (2016) 80-86.
- [2] S. Pilehvar, T. Dierckx, R. Blust, T. Breugelmans, K.J.S. De Wael, *An electrochemical*

### *Supporting information*

impedimetric aptasensing platform for sensitive and selective detection of small molecules such as chloramphenicol, 14 (2014) 12059-12069.

[3] M. Alibolandi, F. Hadizadeh, F. Vajhedin, K. Abnous, M. Ramezani, Design and fabrication of an aptasensor for chloramphenicol based on energy transfer of CdTe quantum dots to graphene oxide sheet, *Materials Science and Engineering: C*, 48 (2015) 611-619.

[4] L. Wu, Y. Hu, Y. Li, L. Lou, W. Yun, H. Chen, L.J.S.A.P.A.M. Yang, B. Spectroscopy, An entropy driven catalytic reaction powered DNA motor for simultaneous detection of ochratoxin A and chloramphenicol in food, 264 (2022) 120264.

[5] Y. Li, L. Wang, L. Zhao, M. Li, Y.J.F.C. Wen, An fluorescence resonance energy transfer sensing platform based on signal amplification strategy of hybridization chain reaction and triplex DNA for the detection of Chloramphenicol in milk, 357 (2021) 129769.

[6] H. Gao, D. Pan, N. Gan, J. Cao, Y. Sun, Z. Wu, X.J.M.A. Zeng, An aptamer-based colorimetric assay for chloramphenicol using a polymeric HRP-antibody conjugate for signal amplification, 182 (2015) 2551-2559.

[7] Y. Yin, Y. Yao, Y. Qin, C. Liu, M. Zhang, H.-W. Shi, Y. Yuan, E. Adams, W. Shen, S. Tang, Enhanced colorimetric strategy: Aptamer-triggered assembly of Ni-Fe layered double oxide/DNA networks for ultrasensitive detection of chloramphenicol, *Journal of Food Composition and Analysis*, 123 (2023) 105513.
